# Supplementary material for: Deregulated expression of the HSP40 family members Auxilin-1 and -2 is indicative of proteostasis imbalance and predicts patient outcome in Ph+ leukemia
Source: PubMed Central journal article supplement (PMC4746784; doi:10.1186/s40164-016-0034-5), 2016-02-09
Supplement: 40164_2016_34_MOESM1_ESM.pdf [file 40164_2016_34_MOESM1_ESM.pdf]

**Supplemental Figure 1: Heat shock protein members are differentially expressed in Ph<sup>+</sup> leukemia**

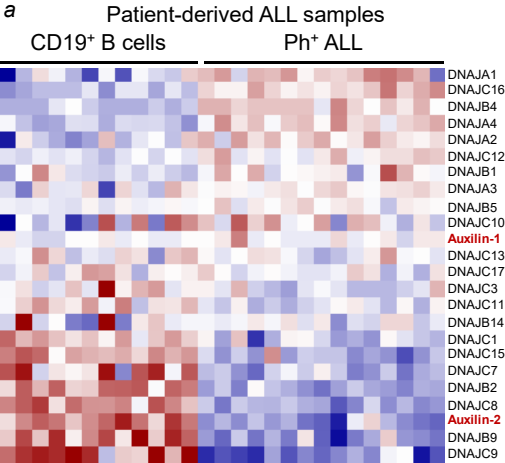

**b**

| Gene             | CML  | ALL  | Imatinib |
|------------------|------|------|----------|
| DNAJC12          | up   | up   | up       |
| DNAJC11          | up   | down |          |
| DNAJB6           | up   |      |          |
| DNAJC4           | down |      | up       |
| DNAJC14          |      |      | up       |
| DNAJB5           | down | up   | up       |
| DNAJC21          |      |      | up       |
| DNAJC30          |      |      |          |
| DNAJA3           | up   | up   |          |
| DNAJA4           | up   | up   | up       |
| <b>Auxilin-1</b> | up   | up   | down     |
| DNAJB8           | down |      |          |
| DNAJC16          |      | up   |          |
| DNAJC18          |      |      |          |
| DNAJD1           |      |      |          |
| DNAJB4           | up   | up   |          |
| DNAJC10          | up   | up   |          |
| DNAJC1           | up   | down |          |
| DNAJC8           | up   | down |          |
| DNAJA5           | up   |      |          |
| DNAJB2           | down | down |          |
| DNAJB9           | down | down | up       |
| DNAJC3           | down | down |          |
| DNAJC5b          | down |      |          |
| DNAJC13          |      | down | up       |
| DNAJA1           | up   | up   |          |
| DNAJC7           | up   | down | up       |
| DNAJB11          | up   |      |          |
| DNAJA2           | down | up   |          |
| DNAJB1           | down | up   | up       |
| DNAJC9           |      | down | up       |
| DNAJB12          |      |      |          |
| DNAJC2           |      |      |          |
| DNAJC27          |      |      |          |
| <b>Auxilin-2</b> | down | down | up       |
