# Supplementary material for: Deregulated expression of the HSP40 family members Auxilin-1 and -2 is indicative of proteostasis imbalance and predicts patient outcome in Ph+ leukemia
Source: PubMed Central journal article supplement (PMC4746784; doi:10.1186/s40164-016-0034-5), 2016-02-09

**Supplemental Figure 2: Auxilin-2 expression is regulated by IRE-1 RNase and BCR-ABL1 kinase activity in Ph<sup>+</sup> ALL**

**a**

BCR1-ABL1<sup>+</sup> ALL cells

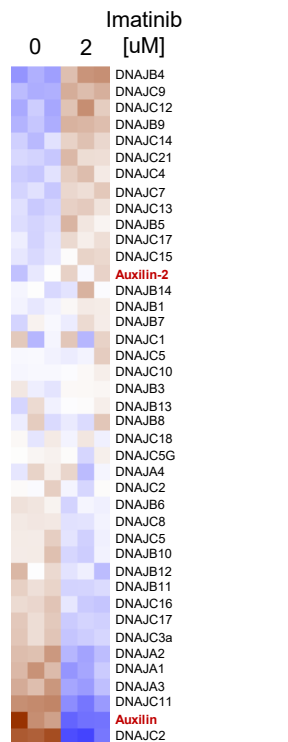

**b**

Auxilin-2

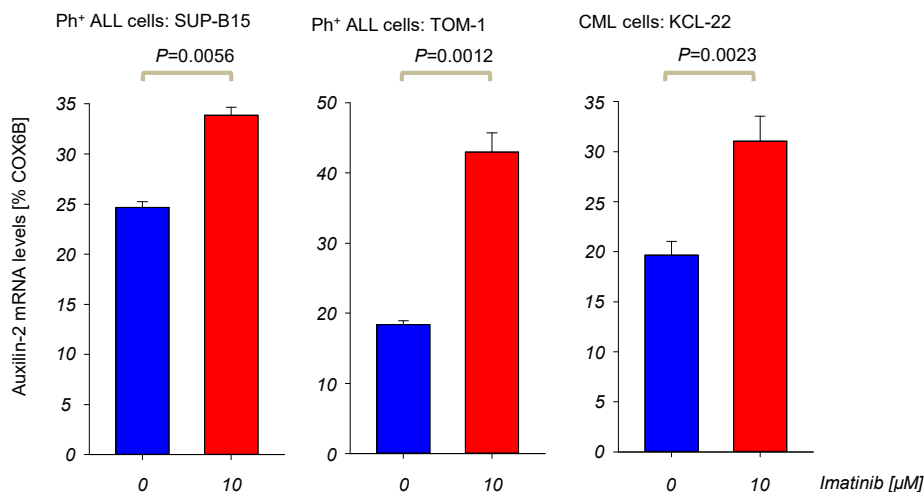

**c**

Auxilin-2

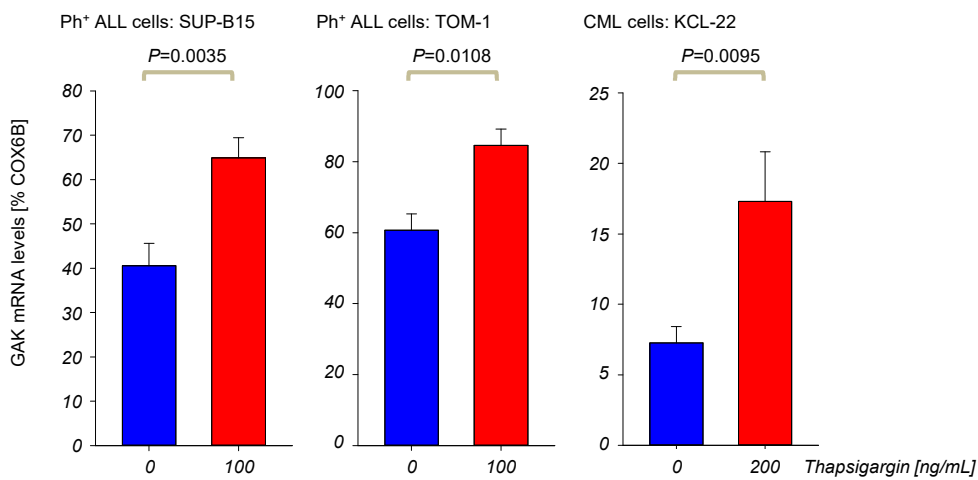

**d**

Auxilin-1

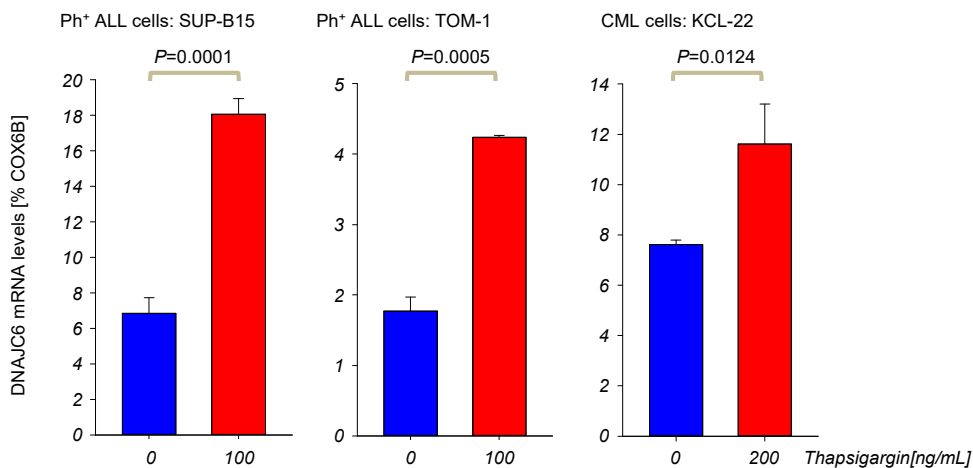

Supplement: 40164_2016_34_MOESM2_ESM.pdf [file 40164_2016_34_MOESM2_ESM.pdf]
