# Supplementary material for: Deregulated expression of the HSP40 family members Auxilin-1 and -2 is indicative of proteostasis imbalance and predicts patient outcome in Ph+ leukemia
Source: PubMed Central journal article supplement (PMC4746784; doi:10.1186/s40164-016-0034-5), 2016-02-09
Supplement: 40164_2016_34_MOESM3_ESM.pdf [file 40164_2016_34_MOESM3_ESM.pdf]

**Supplemental Table 1:** Overview of patient-derived samples of Ph<sup>+</sup> ALL and cell lines

| Case                 | Karyotype                                                                                                                           | Clinical course       | Gender/Age |
|----------------------|-------------------------------------------------------------------------------------------------------------------------------------|-----------------------|------------|
| <b>Primary cases</b> |                                                                                                                                     |                       |            |
| ALL1                 | 46,XX,dic(9;20)(p11;q11),+20(13); 46,xx(8)                                                                                          | First Diagnosis       | f/78y      |
| ALL2                 | t(9;22)                                                                                                                             | First Diagnosis       | m/72y      |
| ET1                  | JAK2 <sup>V617F-</sup> , Calreticulin positive                                                                                      | First Diagnosis       | m/28y      |
| ET2                  | JAK2 <sup>V617F+</sup> , Calreticulin negative                                                                                      | First Diagnosis       | m/57y      |
| ET3                  | ND                                                                                                                                  | ND                    | m/48y      |
| PV1                  | JAK2 <sup>V617F+</sup> , Calreticulin negative, i45X, -Y [11]                                                                       | First Diagnosis       | m/74y      |
| PV2                  | JAK2 <sup>V617F+</sup> , Calreticulin negative, 46, XY                                                                              | First Diagnosis       | nd/40y     |
| B-NHL1               | mantel cell lymphomas                                                                                                               | Firs Diagnosis        | m/77y      |
| <b>Cell lines</b>    |                                                                                                                                     |                       |            |
| BV-173               | add(1)(q42), add(8)(p23),<br>der(22)t(9;22)(q34;q11)                                                                                | lymphoid blast crisis | m/45y      |
| SUP-B15              | t(1;1)(p11;q31), add(3)(q27),<br>add(10)(q25), t(9;22)(q34;q11)                                                                     | Relapse               | m/9y       |
| TOM-1                | del(7)(p14),der(9)del(9)(q13q34)<br>der(22)t(9;22)(q34;q11)                                                                         | Refractory            | f/54y      |
| ALL-PO               | t(4;11)                                                                                                                             | First Diagnosis       | ND/4month  |
| RS4;11               | 47/48<2n>X/XX, +8, +18,<br>t(4;11)(q21;q23), i(7q)                                                                                  | Relapse               | f/32y      |
| SEM                  | 45(40-46)<2n>XX, -13,<br>t(4;11)(q21;q23), del(7)(p14)                                                                              | Relapse               | f/5y       |
| 697                  | 46(45-48)<2n>XY, t(1;19)(q23;p13),<br>del(6)(q21)                                                                                   | Relapse               | m/12y      |
| KCL-22               | 51(47-51)<2n>X, -X, +1, +6, +8, +8, +14, +22,<br>del(1)(p22), t(9;22)(q34;q11),<br>add(17)(p12-13), i(21q), der(22)t(9;22)(q34;q11) | blast crisis          | f/32y      |

**Supplemental Table 2:** *Sequences of oligonucleotide primers used*

Quantitative RT-PCR

**Human**

|                 |                                    |
|-----------------|------------------------------------|
| <i>COX6B_F</i>  | 5'-AACTACAAGACCGCCCCTTT-3'         |
| <i>COX6B_R</i>  | 5'-GCAGCCAGTTCAGATCTTCC-3'         |
| <i>GAK_F</i>    | 5'-GGAGTACGACCAGCCGTATG-3'         |
| <i>GAK_R</i>    | 5'-GGAGGTGTCCTTGAGGTTGG-3'         |
| <i>DNAJC6_F</i> | 5'- TGG GAT GCT AAA CCA GGA GG -3' |
| <i>DNAJC6_R</i> | 5'- GGG TTT GCT GGC AAA GGA AG -3' |
